# Supplementary material for: Highly effective removal of Hg(ii) solution using corn bract@MoS2 as a new biomass adsorbent
Source: Royal Society of Chemistry journal article supplement (doi:10.1039/d2ra05638k), 2022-01-01
Supplement: d2ra05638k1.pdf [file d2ra05638k1.pdf]

## Supporting information

### Highly effective removal of Hg(II) solution using corn bract@MoS<sub>2</sub> as a new biomass adsorbent

Xiaoxu Xu<sup>1#</sup>, Qihui Guo<sup>2#</sup>, Chengyue Yang<sup>2</sup>, Zhuang Hu<sup>2</sup>, Qifan Chen<sup>\*1</sup>, Jianshe Hu<sup>\*2</sup>

<sup>1</sup>College of Chemical Engineering and Machinery, Eastern Liaoning University,  
Dandong, 118001, P. R. China

<sup>2</sup>Center for Molecular Science and Engineering, College of Science, Northeastern  
University, Shenyang, 110819, P. R. China.

Corresponding author: E-mail for J.S. Hu: [hujs@mail.neu.edu.cn](mailto:hujs@mail.neu.edu.cn) and Q.F. Chen:

[qifan\\_C405@163.com](mailto:qifan_C405@163.com)

<sup>#</sup>These authors contributed equally to this work.

#### Materials and instruments

CB come from farmers' markets; Ammonium molybdate tetrahydrate solution (AR 20%) and thiourea were purchased from Tianjin Daomao Chemical Reagent Company (Tianjin, China); Mercurium nitrate was supplied by Guizhou Tongren Tailuier Chemical Plant (Guizhou, China). FT-IR spectrum was recorded on the PerkinElmer spectrum One (B) spectrometer using KBr particles in the range of 4000-500 cm<sup>-1</sup>. Using the Bruker D8 device, X-ray powder diffraction (XRD) spectrum of the Cu-K $\alpha$  radiation ( $\lambda=1.54\text{\AA}$ ) sample under 40kv and 40ma was obtained in the range of 1~10 $^{\circ}$ (2 $\theta$ ). The morphology of the sample was observed with a scanning

electron microscope (SEM, JEOL-6500F). Using Netzsch 209C under N<sub>2</sub> flow conditions, the heating rate is 20 °C min<sup>-1</sup> to perform thermogravimetric analysis (TGA) on the stability of the sample. X-ray photoelectron spectroscopy (XPS) used ESCALAB250 to detect the surface composition of the sample.

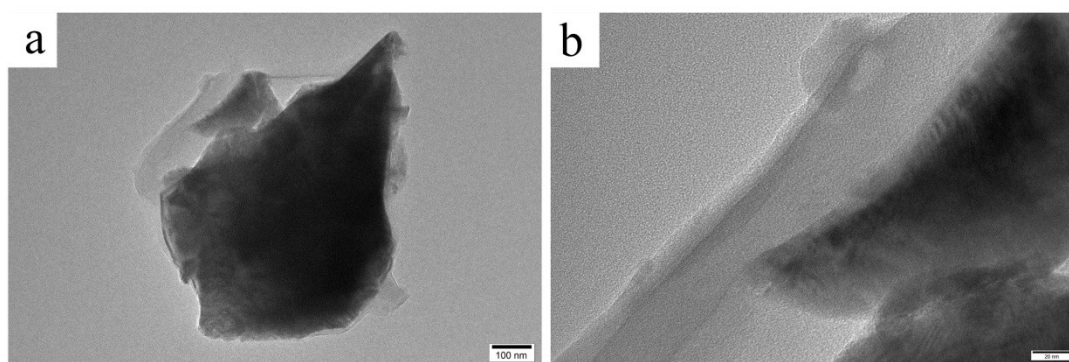

Figure S1 TEM images of CB@MoS<sub>2</sub> (a,b)

Table S1 Langmuir and Freundlich isotherm parameters

| Models     | Parameters                 | value  |
|------------|----------------------------|--------|
| Langmuir   | $Q_{m,cal}$ (mg/g)         | 990.10 |
|            | $K_L$ (min <sup>-1</sup> ) | 0.2583 |
|            | $R^2$                      | 0.9992 |
| Freundlich | $\ln K_F$                  | 6.0181 |
|            | $n$                        | 5.4177 |
|            | $R^2$                      | 0.9088 |

Table S2 Pseudo-first-order, pseudo-second-order and intraparticle diffusion model parameters

| Models                       | Parameters                                                  | value  |
|------------------------------|-------------------------------------------------------------|--------|
| Pseudo-first-order equation  | $Q_{e, \text{exp}} (mg/g)$                                  | 332.50 |
|                              | $Q_{e, \text{cal}} (mg/g)$                                  | 295.75 |
|                              | $k_1 (\text{min}^{-1})$                                     | 0.0659 |
|                              | $R^2$                                                       | 0.8281 |
| Pseudo-second-order equation | $Q_{e, \text{cal}} (mg/g)$                                  | 341.30 |
|                              | $k_2 (\text{g} \cdot \text{mg}^{-1} \cdot \text{min}^{-1})$ | 0.0006 |
|                              | $R^2$                                                       | 0.9991 |
| Intraparticle diffusion      | $k_{p1} (\text{mg g}^{-1} \text{min}^{-0.5})$               | 45.104 |
|                              | $C_1$                                                       | 80.156 |
|                              | $R^2_1$                                                     | 0.9762 |
|                              | $K_{p2} (\text{mg g}^{-1} \text{min}^{-0.5})$               | 13.627 |
|                              | $C_2$                                                       | 200.34 |
|                              | $R^2_2$                                                     | 0.9630 |
|                              | $K_{p3} (\text{mg g}^{-1} \text{min}^{-0.5})$               | 2.5264 |
| $C_3$                        | 302.03                                                      |        |
|                              | $R^2_3$                                                     | 0.5639 |

Table S3 Thermodynamic parameters at different temperatures

| T(K)                      | 298   | 308    | 318    | 328    |
|---------------------------|-------|--------|--------|--------|
| $\Delta G(\text{kJ/mol})$ | -6.69 | -10.00 | -13.32 | -16.64 |

notes:  $\Delta H^0 = 92.108 \text{ kJ/mol}$ ,  $\Delta S^0 = 331.534 \text{ J/mol}$

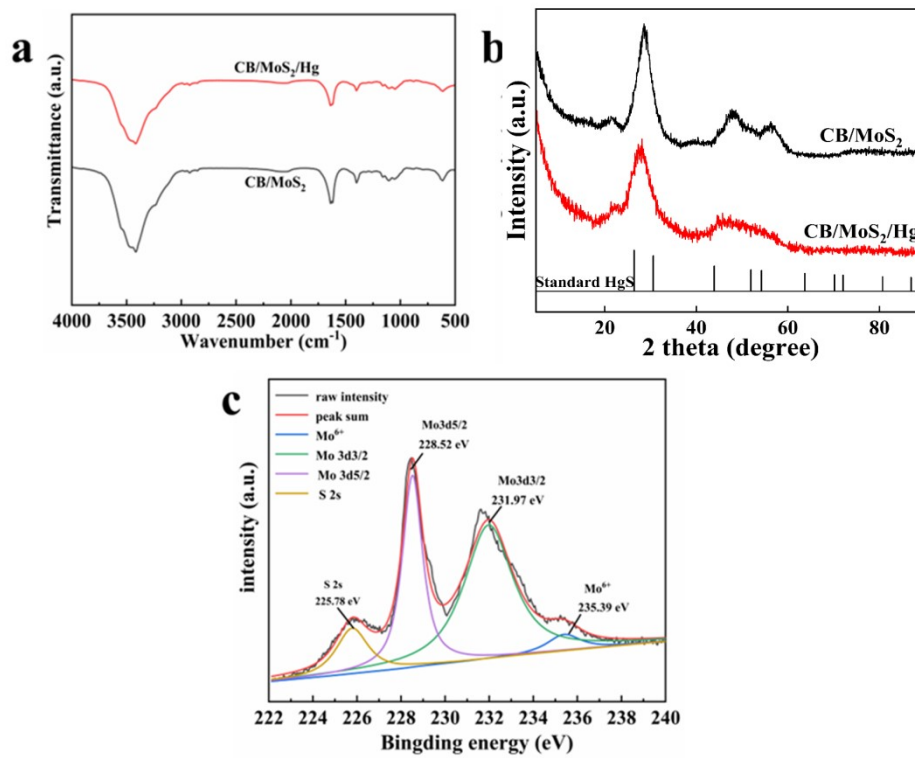

Figure S2 (a) FT-IR spectra of CB@MoS<sub>2</sub> and CB@MoS<sub>2</sub>@HgS; (b) XRD patterns of CB@MoS<sub>2</sub> and CB@MoS<sub>2</sub>@HgS; (c) High-resolution XPS spectrum of Mo3d
